# Supplementary material for: Longitudinal Plasma Measures of Trimethylamine N‐Oxide and Risk of Atherosclerotic Cardiovascular Disease Events in Community‐Based Older Adults
Source: PubMed Central journal article supplement — J Am Heart Assoc. 2021 Aug 16;10(17):e020646. doi: 10.1161/JAHA.120.020646 (PMC8649305; doi:10.1161/jaha.120.020646), 2021-08-16
Supplement: JAH3-10-e020646-s001.pdf [file JAH3-10-e020646-s001.pdf]

# **SUPPLEMENTAL MATERIAL**

**Table S1. Baseline characteristics of US men and women in the Cardiovascular Health Study by quintiles of trimethylamine N-oxide\***

|                                      | Trimethylamine N-oxide |                   |                   |                   |                   | p-value |
|--------------------------------------|------------------------|-------------------|-------------------|-------------------|-------------------|---------|
|                                      | Q1<br>(n=826)          | Q2<br>(n=827)     | Q3<br>(n=825)     | Q4<br>(n=827)     | Q5<br>(n=826)     |         |
| Median TMAO (IQR), $\mu\text{mol/L}$ | 2.29 (1.84, 2.61)      | 3.49 (3.19, 3.77) | 4.72 (4.40, 5.14) | 6.77 (6.16, 7.69) | 13.2 (10.4, 19.9) |         |
| <b>Demographics</b>                  |                        |                   |                   |                   |                   |         |
| Age, (SD) years                      | 71.7 (5.0)             | 71.7 (4.9)        | 72.3 (5.5)        | 72.4 (5.3)        | 72.8 (5.6)        | <0.001  |
| Female, n (%)                        | 584 (70.7)             | 541 (65.4)        | 511 (61.9)        | 492 (59.5)        | 495 (59.9)        | <0.001  |
| Race, n (%)                          |                        |                   |                   |                   |                   | 0.001   |
| White                                | 661 (80.0)             | 686 (83.0)        | 698 (84.6)        | 704 (85.1)        | 721 (87.3)        |         |
| Education, n (%)                     |                        |                   |                   |                   |                   | 0.884   |
| <High school                         | 223 (27.0)             | 227 (27.4)        | 229 (27.8)        | 235 (28.4)        | 207 (25.1)        |         |
| High school                          | 245 (29.7)             | 240 (29.0)        | 237 (28.7)        | 233 (28.2)        | 234 (28.3)        |         |
| Some college                         | 188 (22.8)             | 202 (24.4)        | 180 (21.8)        | 186 (22.5)        | 203 (24.6)        |         |
| College graduate                     | 170 (20.6)             | 158 (19.1)        | 179 (21.7)        | 173 (20.9)        | 182 (22.0)        |         |
| Income group, n (%)                  |                        |                   |                   |                   |                   | 0.032   |
| <\$11,999                            | 224 (27.1)             | 193 (23.3)        | 190 (23.0)        | 198 (23.9)        | 191 (23.1)        |         |
| \$12,000-\$24,999                    | 275 (33.3)             | 315 (38.1)        | 295 (35.8)        | 307 (37.1)        | 294 (35.6)        |         |
| \$25,000-\$49,999                    | 226 (27.4)             | 221 (26.7)        | 244 (29.6)        | 212 (25.6)        | 203 (24.6)        |         |
| >\$50,000                            | 101 (12.2)             | 98 (11.9)         | 96 (11.6)         | 110 (13.3)        | 138 (16.7)        |         |
| <b>Lifestyle and risk factors</b>    |                        |                   |                   |                   |                   |         |
| Self-reported health status, n (%)   |                        |                   |                   |                   |                   | 0.121   |
| Excellent/ Very good                 | 356 (43.1)             | 355 (42.9)        | 361 (43.8)        | 345 (41.7)        | 334 (40.4)        |         |
| Good                                 | 303 (36.7)             | 317 (38.3)        | 326 (39.5)        | 317 (38.3)        | 299 (36.2)        |         |
| Fair/poor                            | 167 (20.2)             | 155 (18.7)        | 138 (16.7)        | 165 (20.0)        | 193 (23.4)        |         |
| Smoking, n (%)                       |                        |                   |                   |                   |                   | 0.002   |
| Never smoked                         | 447 (54.1)             | 387 (46.8)        | 396 (48.0)        | 362 (43.7)        | 377 (45.6)        |         |
| Former smoker                        | 282 (34.1)             | 326 (39.4)        | 336 (40.7)        | 356 (43.0)        | 349 (42.3)        |         |
| Current smoker                       | 97 (11.7)              | 114 (13.8)        | 93 (11.3)         | 109 (13.2)        | 100 (12.1)        |         |
| Physical activity, (SD) kcal         | 1,181 (1,599)          | 1,136 (1,480)     | 1,162 (1,555)     | 1,122 (1,537)     | 1,147 (1,493)     | 0.947   |
| Alcohol, (SD) drinks/wk              | 2.2 (6.2)              | 2.8 (7.3)         | 2.2 (5.6)         | 2.9 (7.0)         | 2.9 (9.7)         | 0.091   |
| BMI, (SD) $\text{kg/m}^2$            | 26.2 (4.8)             | 26.7 (4.9)        | 26.9 (4.6)        | 27.2 (4.7)        | 26.6 (5.0)        | <0.001  |

|                                                                 | Trimethylamine N-oxide |               |               |               |               |         |
|-----------------------------------------------------------------|------------------------|---------------|---------------|---------------|---------------|---------|
|                                                                 | Q1<br>(n=826)          | Q2<br>(n=827) | Q3<br>(n=825) | Q4<br>(n=827) | Q5<br>(n=826) | p-value |
| Waist circumference, (SD) cm                                    | 92.4 (13.7)            | 93.4 (13.3)   | 94.6 (13.2)   | 95.7 (13.4)   | 94.4 (13.8)   | <0.001  |
| Systolic blood pressure, (SD) mmHg                              | 137 (21)               | 136 (22)      | 135 (21)      | 137 (22)      | 135 (21)      | 0.070   |
| Diastolic blood pressure, (SD) mmHg                             | 72 (11)                | 72 (11)       | 71 (11)       | 72 (11)       | 70 (11)       | 0.004   |
| <b>Biochemical, (SD)</b>                                        |                        |               |               |               |               |         |
| HDL cholesterol, mg/dL                                          | 57.8 (15.9)            | 56.7 (16.0)   | 55.0 (15.1)   | 54.5 (15.7)   | 55.0 (15.8)   | <0.001  |
| LDL cholesterol, mg/dL                                          | 131 (36)               | 130 (34)      | 130 (36)      | 128 (33)      | 128 (36)      | 0.333   |
| Triglycerides, mg/dL                                            | 130 (63)               | 134 (66)      | 136 (70)      | 145 (85)      | 139 (75)      | <0.001  |
| C-reactive protein, mg/L                                        | 4.3 (7.2)              | 4.6 (8.4)     | 4.5 (6.7)     | 4.8 (8.7)     | 4.6 (7.2)     | 0.690   |
| Estimated glomerular filtration rate, mL/min/1.73m <sup>2</sup> | 77.3 (14.0)            | 73.5 (14.1)   | 70.0 (15.1)   | 65.6 (16.1)   | 62.4 (18.4)   | <0.001  |
| <b>Medical history, n (%)</b>                                   |                        |               |               |               |               |         |
| Prevalent diabetes                                              | 84 (10.2)              | 85 (10.3)     | 101 (12.2)    | 95 (11.5)     | 85 (10.3)     | 0.570   |
| Lipid lowering medication                                       | 35 (4.2)               | 36 (4.4)      | 39 (4.7)      | 52 (6.3)      | 43 (5.2)      | 0.303   |
| Hypertension medication                                         | 282 (34.1)             | 307 (37.1)    | 331 (40.1)    | 376 (45.5)    | 386 (46.7)    | <0.001  |
| Antibiotics in past 2 weeks                                     | 22 (2.7)               | 26 (3.1)      | 21 (2.5)      | 22 (2.7)      | 25 (3.0)      | 0.935   |
| <b>Dietary habits, (SD)</b>                                     |                        |               |               |               |               |         |
| Fruits, servings/d                                              | 2.2 (1.0)              | 2.1 (1.0)     | 2.2 (1.0)     | 2.1 (1.1)     | 2.2 (1.0)     | 0.623   |
| Vegetables, servings/d                                          | 2.6 (1.3)              | 2.5 (1.3)     | 2.6 (1.4)     | 2.5 (1.4)     | 2.6 (1.4)     | 0.475   |
| Fiber, g/d                                                      | 29.6 (11.8)            | 30.0 (11.8)   | 29.4 (11.8)   | 28.6 (11.6)   | 28.7 (11.9)   | 0.074   |
| Total animal product, servings/d                                | 1.65 (0.92)            | 1.67 (0.96)   | 1.71 (1.02)   | 1.79 (0.96)   | 1.77 (1.00)   | 0.012   |

\* Values reported as mean (SD) for continuous variables, and frequency, percentage (%) for categorical variables, unless otherwise stated. 3,877 participants entered the study at baseline (1989-90 or 1992-93) and 254 participants at 1996-97. IQR= interquartile range (25<sup>th</sup>, 75<sup>th</sup>)

**Table S2. Spearman correlation coefficient for repeated within-individual measures of trimethylamine-N-oxide over two time points\***

|                                 | <b>TMAO measured at baseline<br/>(1989-90 or 1992-93)</b> |
|---------------------------------|-----------------------------------------------------------|
| <b>TMAO measured in 1996-97</b> | 0.254                                                     |

\*2,470 participants who had two TMAO measures at baseline (1989-90 or 1992-93) and 1996-97.

**Table S3. Trimethylamine N-oxide and the risk of atherosclerotic cardiovascular disease in the Cardiovascular Health Study: analysis of potential interaction by age, sex, body mass index, and estimated glomerular filtration rate with respective stratified analyses with Bonferroni correction (significance<0.01)\***

| (Cases/Total population)                    | TMAO              |         |
|---------------------------------------------|-------------------|---------|
|                                             | HR (95% CI)       | P-value |
| <b>Age</b>                                  |                   |         |
| ≤71 years (912/2,237)                       | 1.08 (0.98, 1.18) | 0.03    |
| >71 years (854/1,894)                       | 1.04 (0.97, 1.12) |         |
| <b>Sex</b>                                  |                   |         |
| Female (1,108/2,623)                        | 1.06 (0.99, 1.14) | 0.74    |
| Male (658/1,508)                            | 1.04 (0.95, 1.14) |         |
| <b>BMI</b>                                  |                   |         |
| <25kg/m <sup>2</sup> (645/1,597)            | 1.06 (0.98, 1.15) | 0.50    |
| 25-29.9 kg/m <sup>2</sup> (754/1,708)       | 1.06 (0.97, 1.16) |         |
| ≥30 kg/m <sup>2</sup> (367/826)             | 1.04 (0.88, 1.22) |         |
| <b>eGFR</b>                                 |                   |         |
| ≤60 mL/min/1.73m <sup>2</sup> (471/1,058)   | 1.09 (1.02, 1.17) | <0.001  |
| >60 mL/min/1.73m <sup>2</sup> (1,295/3,073) | 0.97 (0.88, 1.06) |         |

Multivariable adjustments include age (65-74y, 75-84y, 85y+), sex (male, female), race (white, non-white), study site (Bowman Gray, Davis, Hopkins, Pittsburgh), education (<high school, high school, some college, college graduate), income (<\$11,999, \$12,000-\$24,999, \$25,000-\$49,999, >\$50,000/y), self-reported health status (excellent, very good, good/fair/poor), smoking status (never, former, current), alcohol intake (0, <1, 1-2.49, 2.5-7.49, 7.5-14.49, >14.5 drinks/wk), physical activity (<500, 500-1000, 1000-1500, >1500 kcal/wk), BMI (<18.5, 18.5-25, 25.1-30, >30 kg/m<sup>2</sup>), waist circumference (cm), lipid lowering medication (yes/no), anti-hypertensive medication (yes/no), antibiotics (yes/no), prevalent diabetes (yes/no), high-density lipoprotein cholesterol (mg/dL), low-density lipoprotein cholesterol (mg/dL), triglycerides (mg/dL), C-reactive protein (mg/L), systolic blood pressure (mmHg), diastolic blood pressure (mmHg)

\*P-value obtained from continuous interaction term for age, BMI, and eGFR, and categorical interaction term for sex (females as reference).

**Table S4. Relative risk of atherosclerotic cardiovascular disease (n=1,739) associated with long-term levels of plasma trimethylamine among 4,066 older men and women in the Cardiovascular Health Study, excluding participants who had taken antibiotics in the 2 weeks prior to study entry (n=65).**

|                                                      | Trimethylamine N-oxide quintiles |                  |                  |                  |                  | p-trend |
|------------------------------------------------------|----------------------------------|------------------|------------------|------------------|------------------|---------|
|                                                      | Q1                               | Q2               | Q3               | Q4               | Q5               |         |
| Median TMAO, $\mu\text{mol/L}$                       | 2.3                              | 3.5              | 4.7              | 6.8              | 13.1             |         |
| Cases/Total                                          | 246/814                          | 323/812          | 397/814          | 423/812          | 350/814          |         |
| Person-years                                         | 9,560                            | 11,123           | 11,249           | 11,846           | 9,846            |         |
| Age, sex adjusted                                    | 1.00 (Reference)                 | 1.05 (0.89-1.24) | 1.24 (1.05-1.45) | 1.21 (1.04-1.42) | 1.24 (1.06-1.47) | 0.014   |
| Multivariable <sup>†</sup>                           | 1.00 (Reference)                 | 1.04 (0.88-1.23) | 1.24 (1.06-1.46) | 1.17 (1.00-1.38) | 1.23 (1.04-1.45) | 0.028   |
| Multivariable and diet <sup>‡</sup>                  | 1.00 (Reference)                 | 1.05 (0.89-1.24) | 1.24 (1.05-1.45) | 1.17 (0.99-1.37) | 1.22 (1.04-1.45) | 0.035   |
| Multivariable, diet, and renal function <sup>§</sup> | 1.00 (Reference)                 | 1.01 (0.86-1.20) | 1.16 (0.99-1.37) | 1.07 (0.91-1.26) | 1.08 (0.91-1.29) | 0.579   |

<sup>†</sup>Multivariable adjustments include age (65-74y, 75-84y, 85y+), sex (male, female), race (white, non-white), study site (Bowman Gray, Davis, Hopkins, Pittsburgh), education (<high school, high school, some college, college graduate), income (<\$11,999, \$12,000-\$24,999, \$25,000-\$49,999, >\$50,000/y), self-reported health status (excellent, very good, good/fair/poor), smoking status (never, former, current), alcohol intake (0, <1, 1-2.49, 2.5-7.49, 7.5-14.49, >14.5 drinks/wk), physical activity (<500, 500-1000, 1000-1500, >1500 kcal/wk), BMI (<18.5, 18.5-25, 25.1-30, >30 kg/m<sup>2</sup>), waist circumference (cm), lipid lowering medication (yes/no), anti-hypertensive medication (yes/no), antibiotics (yes/no), prevalent diabetes (yes/no), high-density lipoprotein cholesterol (mg/dL), low-density lipoprotein cholesterol (mg/dL), triglycerides (mg/dL), C-reactive protein (mg/L), systolic blood pressure (mmHg), diastolic blood pressure (mmHg)

<sup>‡</sup>Diet adjustments include fruits (servings/d), vegetables (servings/d), fiber (g/d), and total animal source food (servings/week).

<sup>§</sup>Estimated glomerular filtration rate (mL/min/1.73m<sup>2</sup>) is calculated based on the CKD-EPI creatinine-cystatin C equation.<sup>39</sup>

**Table S5. Sensitivity analyses for the associations between long-term levels of plasma trimethylamine among 4,031 older men and women in the Cardiovascular Health Study excluding events within the first 2 years of follow-up\***

|                                                      | Trimethylamine N-oxide quintiles |                  |                  |                  |                  | p-trend |
|------------------------------------------------------|----------------------------------|------------------|------------------|------------------|------------------|---------|
|                                                      | Q1                               | Q2               | Q3               | Q4               | Q5               |         |
| Median TMAO, $\mu\text{mol/L}$                       | 2.3                              | 3.5              | 4.7              | 6.7              | 13.2             |         |
| Cases/Total                                          | 238/807                          | 307/805          | 389/806          | 395/807          | 337/806          |         |
| Person-years                                         | 9,443                            | 11,157           | 11,613           | 12,192           | 9,942            |         |
| Age, sex adjusted                                    | 1.00 (Reference)                 | 1.00 (0.84-1.18) | 1.16 (0.99-1.37) | 1.10 (0.94-1.29) | 1.19 (1.01-1.41) | 0.032   |
| Multivariable <sup>†</sup>                           | 1.00 (Reference)                 | 0.98 (0.83-1.16) | 1.15 (0.98-1.36) | 1.05 (0.89-1.24) | 1.17 (0.99-1.39) | 0.053   |
| Multivariable and diet <sup>‡</sup>                  | 1.00 (Reference)                 | 0.98 (0.82-1.16) | 1.15 (0.98-1.36) | 1.04 (0.89-1.23) | 1.17 (0.99-1.39) | 0.049   |
| Multivariable, diet, and renal function <sup>§</sup> | 1.00 (Reference)                 | 0.95 (0.80-1.12) | 1.08 (0.92-1.28) | 0.96 (0.81-1.13) | 1.04 (0.87-1.25) | 0.576   |

\*100 ASCVD events occurred within the first 2 years of follow-up to minimize reverse causation (pre-existing subclinical disease leading to changes in levels of TMAO).

<sup>†</sup>Multivariable adjustments include age (65-74y, 75-84y, 85y+), sex (male, female), race (white, non-white), study site (Bowman Gray, Davis, Hopkins, Pittsburgh), education (<high school, high school, some college, college graduate), income (<\$11,999, \$12,000-\$24,999, \$25,000-\$49,999, >\$50,000/y), self-reported health status (excellent, very good, good/fair/poor), smoking status (never, former, current), alcohol intake (0, <1, 1-2.49, 2.5-7.49, 7.5-14.49, >14.5 drinks/wk), physical activity (<500, 500-1000, 1000-1500, >1500 kcal/wk), BMI (<18.5, 18.5-25, 25.1-30, >30 kg/m<sup>2</sup>), waist circumference (cm), lipid lowering medication (yes/no), anti-hypertensive medication (yes/no), antibiotics (yes/no), prevalent diabetes (yes/no), high-density lipoprotein cholesterol (mg/dL), low-density lipoprotein cholesterol (mg/dL), triglycerides (mg/dL), C-reactive protein (mg/L), systolic blood pressure (mmHg), diastolic blood pressure (mmHg)

<sup>‡</sup>Diet adjustments include fruits (servings/d), vegetables (servings/d), fiber (g/d), and total animal source food (servings/week).

<sup>§</sup>Estimated glomerular filtration rate (mL/min/1.73m<sup>2</sup>) is calculated based on the CKD-EPI creatinine-cystatin C equation.<sup>39</sup>

**Table S6. Sensitivity analyses for the associations between long-term levels of plasma trimethylamine among 4,055 older men and women in the Cardiovascular Health Study excluding those who reported poor self-reported health at study entry\***

|                                                      | Trimethylamine N-oxide quintiles |                  |                  |                  |                  | p-trend |
|------------------------------------------------------|----------------------------------|------------------|------------------|------------------|------------------|---------|
|                                                      | Q1                               | Q2               | Q3               | Q4               | Q5               |         |
| Median TMAO, $\mu\text{mol/L}$                       | 2.3                              | 3.5              | 4.7              | 6.8              | 13.2             |         |
| Cases/Total                                          | 249/811                          | 309/810          | 404/811          | 418/812          | 351/811          |         |
| Person-years                                         | 9,483                            | 11,140           | 11,406           | 11,903           | 9,937            |         |
| Age, sex adjusted                                    | 1.00 (Reference)                 | 0.99 (0.84-1.17) | 1.21 (1.03-1.42) | 1.17 (1.00-1.37) | 1.21 (1.03-1.42) | 0.016   |
| Multivariable <sup>†</sup>                           | 1.00 (Reference)                 | 0.97 (0.82-1.15) | 1.22 (1.04-1.43) | 1.14 (0.97-1.33) | 1.19 (1.01-1.41) | 0.032   |
| Multivariable and diet <sup>‡</sup>                  | 1.00 (Reference)                 | 0.97 (0.82-1.15) | 1.21 (1.04-1.43) | 1.13 (0.96-1.33) | 1.19 (1.01-1.41) | 0.031   |
| Multivariable, diet, and renal function <sup>§</sup> | 1.00 (Reference)                 | 0.94 (0.79-1.11) | 1.15 (0.98-1.35) | 1.04 (0.88-1.22) | 1.06 (0.89-1.26) | 0.510   |

\* Excluded 61 individuals who self-reported poor health at baseline (1989-90 or 1992-93) and 15 individuals who entered in 1996-97 and who self-reported poor health.

<sup>†</sup> Multivariable adjustments include age (65-74y, 75-84y, 85y+), sex (male, female), race (white, non-white), study site (Bowman Gray, Davis, Hopkins, Pittsburgh), education (<high school, high school, some college, college graduate), income (<\$11,999, \$12,000-\$24,999, \$25,000-\$49,999, >\$50,000/y), self-reported health status (excellent, very good, good/fair/poor), smoking status (never, former, current), alcohol intake (0, <1, 1-2.49, 2.5-7.49, 7.5-14.49, >14.5 drinks/wk), physical activity (<500, 500-1000, 1000-1500, >1500 kcal/wk), BMI (<18.5, 18.5-25, 25.1-30, >30 kg/m<sup>2</sup>), waist circumference (cm), lipid lowering medication (yes/no), anti-hypertensive medication (yes/no), antibiotics (yes/no), prevalent diabetes (yes/no), high-density lipoprotein cholesterol (mg/dL), low-density lipoprotein cholesterol (mg/dL), triglycerides (mg/dL), C-reactive protein (mg/L), systolic blood pressure (mmHg), and diastolic blood pressure (mmHg)

<sup>‡</sup> Diet adjustments include fruits (servings/d), vegetables (servings/d), fiber (g/d), and total animal source food (servings/week).

<sup>§</sup> Estimated glomerular filtration rate (mL/min/1.73m<sup>2</sup>) is calculated based on the CKD-EPI creatinine-cystatin C equation.<sup>39</sup>



**Table S7. Relative risk of atherosclerotic cardiovascular disease associated with levels of plasma trimethylamine among 4,131 older men and women in the Cardiovascular Health Study (simple updating approach)\***

|                                                      | Trimethylamine N-oxide quintiles |                  |                  |                  |                  | p-trend |
|------------------------------------------------------|----------------------------------|------------------|------------------|------------------|------------------|---------|
|                                                      | Q1                               | Q2               | Q3               | Q4               | Q5               |         |
| <b>Overall individuals (n=4,131)</b>                 |                                  |                  |                  |                  |                  |         |
| Median TMAO, $\mu\text{mol/L}$                       | 2.3                              | 3.5              | 4.7              | 6.8              | 13.1             |         |
| Cases/Total                                          | 280/827                          | 280/826          | 309/826          | 370/826          | 527/826          |         |
| Person-years                                         | 10,306                           | 10,141           | 10,402           | 10,412           | 13,186           |         |
| Age, sex adjusted                                    | 1.00 (Reference)                 | 1.00 (0.85-1.18) | 1.03 (0.87-1.21) | 1.22 (1.04-1.42) | 1.21 (1.05-1.41) | 0.001   |
| Multivariable <sup>†</sup>                           | 1.00 (Reference)                 | 1.01 (0.85-1.19) | 1.04 (0.88-1.23) | 1.17 (1.00-1.37) | 1.17 (1.01-1.36) | 0.013   |
| Multivariable and diet <sup>‡</sup>                  | 1.00 (Reference)                 | 1.01 (0.85-1.19) | 1.03 (0.88-1.22) | 1.16 (0.99-1.36) | 1.16 (1.00-1.35) | 0.023   |
| Multivariable, diet, and renal function <sup>§</sup> | 1.00 (Reference)                 | 0.98 (0.82-1.15) | 0.97 (0.82-1.14) | 1.05 (0.89-1.24) | 1.01 (0.87-1.19) | 0.653   |

\* Plasma TMAO levels at baseline (1989-90 or 1992-93) were related to risk of ASCVD from 1989-90 or 1992-93 to 1996-97, and the plasma TMAO levels in 1996-97 were related to risk of ASCVD from 1996-97 to 2015.

<sup>†</sup>Multivariable adjustments include age (65-74y, 75-84y, 85y+), sex (male, female), race (white, non-white), study site (Bowman Gray, Davis, Hopkins, Pittsburgh), education (<high school, high school, some college, college graduate), income (<\$11,999, \$12,000-\$24,999, \$25,000-\$49,999, >\$50,000/y), self-reported health status (excellent, very good, good/fair/poor), smoking status (never, former, current), alcohol intake (0, <1, 1-2.49, 2.5-7.49, 7.5-14.49, >14.5 drinks/wk), physical activity (<500, 500-1000, 1000-1500, >1500 kcal/wk), BMI (<18.5, 18.5-25, 25.1-30, >30 kg/m<sup>2</sup>), waist circumference (cm), lipid lowering medication (yes/no), anti-hypertensive medication (yes/no), antibiotics (yes/no), prevalent diabetes (yes/no), high-density lipoprotein cholesterol (mg/dL), low-density lipoprotein cholesterol (mg/dL), triglycerides (mg/dL), C-reactive protein (mg/L), systolic blood pressure (mmHg), diastolic blood pressure (mmHg)

<sup>‡</sup>Diet adjustments include fruits (servings/d), vegetables (servings/d), fiber (g/d), and total animal source food (servings/week).

<sup>§</sup> Estimated glomerular filtration rate (mL/min/1.73m<sup>2</sup>) is calculated based on the CKD-EPI creatinine-cystatin C equation.<sup>39</sup>

**Figure S1. Flow chart of this study.**

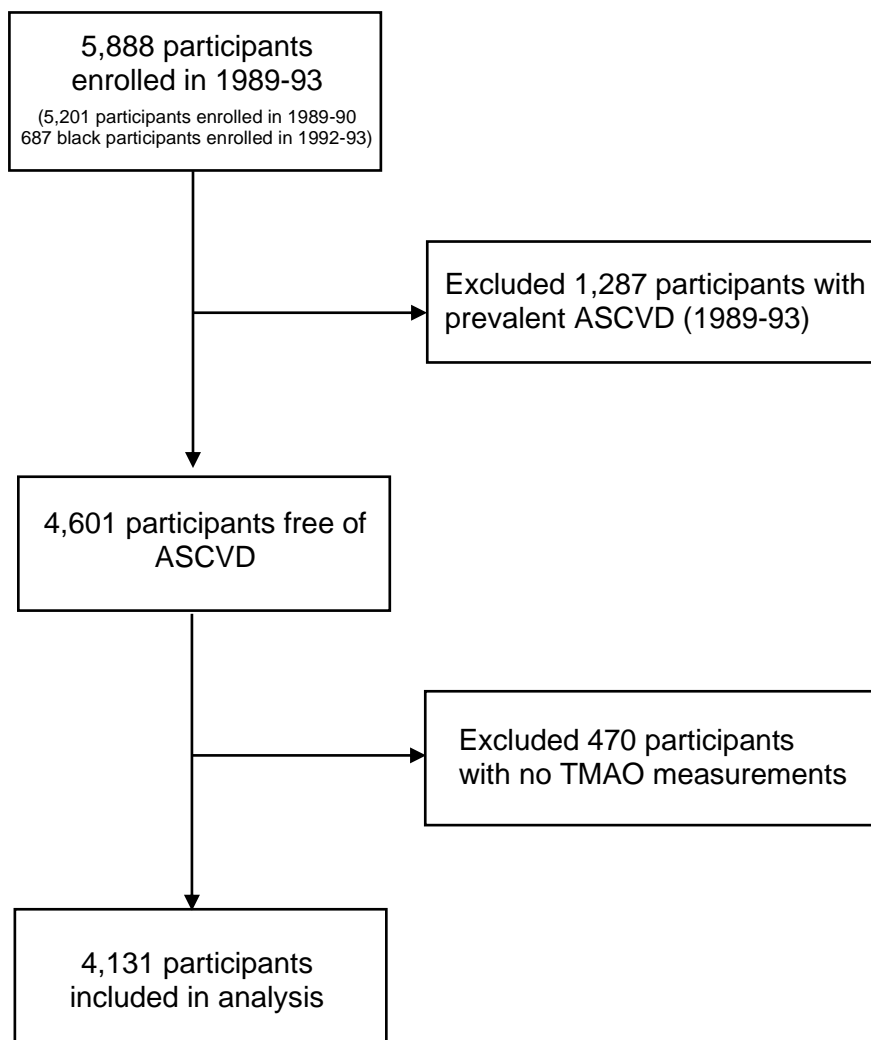

ASCVD, atherosclerotic cardiovascular disease; TMAO, trimethylamine-N-oxide
